# Supplementary material for: Obstructive sleep apnea (OSA) is associated with increased risk of early-onset sarcopenia and sarcopenic obesity: Results from NHANES 2015-2018.
Source: Research Square preprint supplement (doi:10.21203/rs.3.rs-3635355/v1), 2023-11-25
Supplement: Supplementary file 1 [file 1b49e3caecd01cb0c4611ee6.docx]

| **Table 1. Baseline characteristics of study participants** | | | | | | |  |  |  | |  | |  | |  | |  | |
| --- | --- | --- | --- | --- | --- | --- | --- | --- | --- | --- | --- | --- | --- | --- | --- | --- | --- | --- |
|  |  |  | **Participants**  **with OSA** | | |  | **Participants without OSA** | | |  | | ***P* value** | | | | | |
| **(n = 1157,27.8%)** | | | **(n = 2824,72.2%)** | | |
| Age (years), mean (SD)† | | | 40.97(0.44) | | |  | 37.54(0.40） | | |  | | <0.01 | | | | | |
| Age category, n (%)† |  |  |  |  |  |  |  |  |  | |  | | <0.01 | | | | | |
|  | 18≤age<40 |  | 656(54.7%) | | |  | 1189(44.4%) | | |  | |  | |  | |  | |
|  | 40≤age≤60 |  | 501(45.3%) | | |  | 1635(55.6%) | | |  | |  | |  | |  | |
| Sex/Gender: Male, n (%)† | | | 629(56.6%) | | |  | 1312(47.3%) | | |  | | <0.01 | | | | | |
| Race/ethnicity, n (%) |  |  |  |  |  |  |  | | |  | | 0.128 | | | | | |
|  | Non-Hispanic white |  | 368(58.9%) | | |  | 939(62.3%) | | |  | |  | |  | |  | |
|  | Non-Hispanic black |  | 218(10.4%) | | |  | 566(10.5%) | | |  | |  | |  | |  | |
|  | Mexican American |  | 234(12.9%) | | |  | 486(10.2%) | | |  | |  | |  | |  | |
|  | Others |  | 337(17.8%) | | |  | 833(17.0%) | | |  | |  | |  | |  | |
| Education, n (%) |  |  |  | | |  |  |  |  | |  | | 0.3602 | | | | | |
|  | High school or above |  | 913(85.4%) | | |  | 2191 (86.6%) | | |  | |  | |  | |  | |
| Family income-to-poverty ratio, mean (SD) |  |  | 2.81(0.10) | | |  | 3.0718(0.07) | | |  | | 0.02098 | | | | | |
|  | <=1.3, n (%) |  | 383(23.6%) | | |  | 848(21.0%) | | |  | | 0.1353 | | | | | |
| Married, n (%)† |  |  | 597 (55.2%) | | |  | 1179 (49.1%) | | |  | | <0.01 | | | | | |
| Smoking status, n (%)† | | |  |  |  |  |  |  |  | |  | | <0.01 | | | | | |
|  | Non-smoker |  | 631(51.4%) | | |  | 1844(62.6%) | | |  | |  | |  | |  | |
|  | former-smoker |  | 229(23.1%) | | |  | 438(19.6%) | | |  | |  | |  | |  | |
|  | Current Smoker |  | 297(25.5%) | | |  | 542(17.8%) | | |  | |  | |  | |  | |
| Alcohol status, n (%) |  |  |  |  |  |  |  |  |  | |  | | 0.1955 | | | | | |
|  | Non-drinker |  | 341(24.7%) | | |  | 891(25.0%) | | |  | |  | |  | |  | |
|  | drinker |  | 816(75.3%) | | |  | 1933 (75.0%) | | |  | |  | |  | |  | |
| CRP (mg/L), mean (SD) † |  |  |  | 4.47(0.29) |  |  |  | 3.23(0.18) |  | |  | |  | | <0.01 | |  | |
| HOMA-IR, mean (SD) † |  |  |  | 4.35(0.24) |  |  |  | 2.87(0.16) |  | |  | |  | | <0.01 | |  | |
| Caffeine intake(mg/d), mean (SD)† |  |  | 14.0(0.84) | | |  | 11.6(0.68) | | |  | | <0.01 | | | | | |
| Health eating index, mean (SD)† | | |  | 47.2(0.55) |  |  |  | 49.9(0.57) |  | |  | |  | |  | |  | |
| Sendentary time(min), mean (SD) |  |  | 414.0(12.5) | | |  | 406.8(15.8) | | |  | | 0.486 | | | | | |
| Sleep duration(hours), mean (SD)† |  |  | 7.52(0.04) | | |  | 7.58(0.03) | | |  | | <0.01 | | | | | |
| ALM,mean (SD)† |  |  | 24.98(0.26) | | |  | 22.46(0.15) | | |  | | <0.01 | | | | | |
| BMI (kg/m2), mean (SD)† | | | 31.75(0.27) | | |  | 27.76(0.23) | | |  | | <0.01 | | | | | |
| BMI category (kg/m2), n (%)† | | |  |  |  |  |  |  |  | |  | | <0.01 | | | | | |
|  | Underweight (<=25) |  | 189(16.1%) | | |  | 1098(38.6%) | | |  | |  | |  | |  | |
|  | Overweight (25<&≤30) |  | 329(28.6%) | | |  | 855(30.8%) | | |  | |  | |  | |  | |
|  | Obese (>30) |  | 639(55.3%) | | |  | 871(30.5%) | | |  | |  | |  | |  | |
| ALM/BMI(kg),mean (SD)† |  |  | 0.79(0.001) | | |  | 0.83(0.006) | | |  | | <0.05 | | | | | |
| Sarcopenia, n (%)† |  |  | 159(12.0%) | | |  | 205(5.5%) | | |  | | <0.01 | | | | | |
| Sarcopenic obesity, n (%)† |  |  | 126(10.3%) | | |  | 136(4.0%) | | |  | | <0.01 | | | | | |
| Diseases, n (%)† |  |  |  |  |  |  |  |  |  | |  | |  | |  | |  | |
|  | Diabetes† |  | 172 (12.3%) | | |  | 246(6.2%) | | |  | | <0.01 | | | | | |
|  | Hypertension† |  | 306(26.2%) | | |  | 443(14.3%) | | |  | | <0.01 | | | | | |
|  | thyroid disease |  | 95(9.0%) | | |  | 170(6.6%) | | |  | | 0.1235 | | | | | |
|  | heart disease† |  | 56(3.9%) | | |  | 51(1.7%) | | |  | | <0.01 | | | | | |

*Note:* Data are presented as unweighted frequencies (weighted percentages) or weighted mean (SD) unless otherwise indicated.

† represents statistical difference by students' t test for continuous variables and chi-square test for categorical variables (*P*<0.05 was considered statistically significant).

All estimates are accounted for complex survey designs.

Abbreviation: C-reactive protein (CRP), HOMA insulin resistance index(HOMA-IR), appendicular lean mass (ALM), body mass index (BMI)
